# Supplementary material for: A Novel IRAK4 Inhibitor DW18134 Ameliorates Peritonitis and Inflammatory Bowel Disease
Source: MDPI journal article supplement (doi:10.3390/molecules29081803), 2024-04-16
Supplement: s1 [file s1]

## Supplementary data

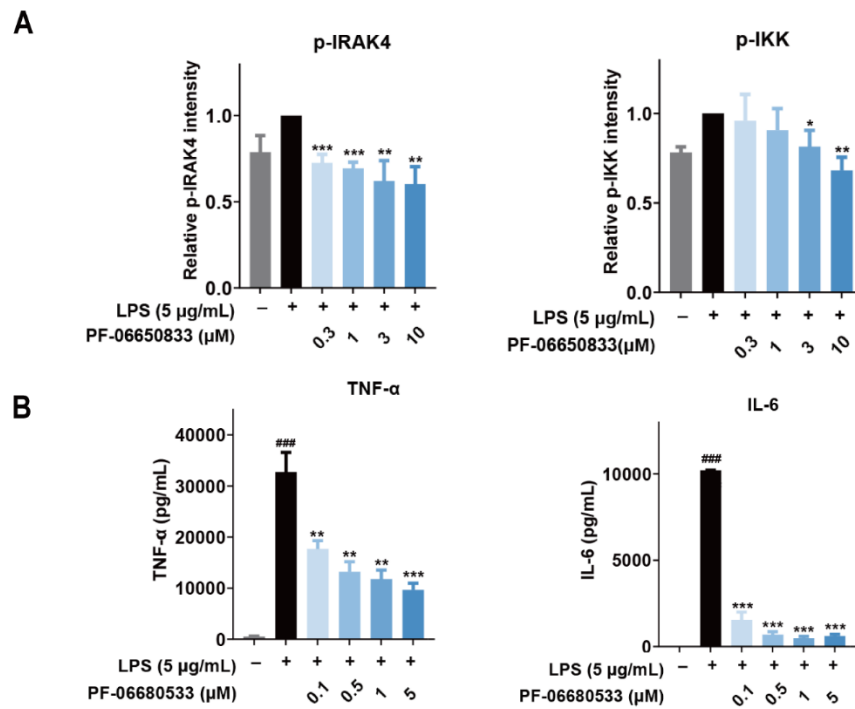

**Figure S1:** Effects of PF-06650833 on the LPS-induced IRAK4 signaling transduction and secretion of cytokines in RAW264.7. (A) Quantification of p-IRAK4 and p-IKK levels in RAW264.7 cells. (B) The secretion levels of TNF-α and IL-6 in the supernatants of RAW264.7 cells were measured by ELISA.

**Table S1** The behavior scoring standard of LPS-induced acute inflammation mouse model

| Score         | 0            | 1             | 2      | 3                | 4                 |
|---------------|--------------|---------------|--------|------------------|-------------------|
| Vertical hair | Asymptomatic | Mild          | Medium | Serious          | Extremely serious |
| Diarrhea      | Asymptomatic | Mild          | Medium | Serious          | Extremely serious |
| Movement      | Normal       | Slightly Slow | Slow   | Almost unchanged | No                |

**Table S2** RT-qPCR primers used in this study

| Gene          |         | Sequence (5–3')          |
|---------------|---------|--------------------------|
| TNF- $\alpha$ | Forward | GCTACGACGTGGGCTACAG      |
|               | Reverse | CCCTCACACTCAGATCATCTTCT  |
| IL-6          | Forward | AGTTGCCTTCTTGGGACTGA     |
|               | Reverse | CAGAATTGCCATTGCACAAC     |
| IL-1 $\beta$  | Forward | GCAACTGTTCTGAACTCAACT    |
|               | Reverse | ATCTTTTGGGGTCCGTCAACT    |
| ZO-1          | Forward | GCCGCTAAGAGCACAGCAA      |
|               | Reverse | TCCCCACTCTGAAAATGAGGA    |
| Occludin      | Forward | TTGAAAGTCCACCTCCTTA CAGA |
|               | Reverse | CCGGATAAAAAGAGTACG CTGG  |
| E-cadherin    | Forward | CAGGTCTCCTCATGGCTTT GC   |
|               | Reverse | CTCCGAAAAGAAGGCTG TCC    |
| MUC2          | Forward | AGGGCTCGGAACTCCAGA AA    |
|               | Reverse | CCAGGGAATCGGTAGACA TCG   |
| Actin         | Forward | GAGACCTTCAACACCCCAGC     |
|               | Reverse | ATGTCACGCACGATTTCCC      |

**Table S3** Histological evaluations of H&E-stained

| Score | symptom                                                                                                                                                  |
|-------|----------------------------------------------------------------------------------------------------------------------------------------------------------|
| 0     | no signs of inflammation                                                                                                                                 |
| 1     | low leukocyte infiltration                                                                                                                               |
| 2     | moderate leukocyte infiltration                                                                                                                          |
| 3     | high leukocyte infiltration, moderate fibrosis, high vascular density, thickening of the colon wall, moderate goblet cell loss, and focal loss of crypts |
| 4     | transmural infiltrations, massive loss of goblet cells, extensive fibrosis, and diffuse loss of crypts                                                   |
